# Supplementary material for: Generation of biophysical neuron model parameters from recorded electrophysiological responses
Source: eLife journal article supplement (doi:10.7554/elife.95607), 2024-06-13
Supplement: supp1 [file predicted_params.xlsx]

## Sheet: Small
Parameters	RIM	DVC	HSN	AIY	URX	RIS	AFD	AWB	AWC	Unit	Min	Max	Fitted
SHL1_g	0.00950048	0.00341689	0.00695336	0.0204998	0.0852271	0.00139317	0.342741	0.0384665	0.0731594	nS	0	3	O
SHL1_m_inf_Veq	-6.8	-6.8	-6.8	-6.8	-6.8	-6.8	-6.8	-6.8	-6.8	mV	-6.8	-6.8	X
SHL1_m_inf_ka	14.1	14.1	14.1	14.1	14.1	14.1	14.1	14.1	14.1	mV	14.1	14.1	X
SHL1_h_inf_Veq	-40	-40	-40	-40	-40	-40	-40	-40	-40	mV	-40	-40	X
SHL1_h_inf_ka	8.3	8.3	8.3	8.3	8.3	8.3	8.3	8.3	8.3	mV	8.3	8.3	X
SHL1_m_tau_a	1.4	1.4	1.4	1.4	1.4	1.4	1.4	1.4	1.4	ms	1.4	1.4	X
SHL1_m_tau_b	-17.5	-17.5	-17.5	-17.5	-17.5	-17.5	-17.5	-17.5	-17.5	mV	-17.5	-17.5	X
SHL1_m_tau_c	12.9	12.9	12.9	12.9	12.9	12.9	12.9	12.9	12.9	mV	12.9	12.9	X
SHL1_m_tau_d	-3.7	-3.7	-3.7	-3.7	-3.7	-3.7	-3.7	-3.7	-3.7	mV	-3.7	-3.7	X
SHL1_m_tau_e	6.5	6.5	6.5	6.5	6.5	6.5	6.5	6.5	6.5	mV	6.5	6.5	X
SHL1_m_tau_f	0.2	0.2	0.2	0.2	0.2	0.2	0.2	0.2	0.2	ms	0.2	0.2	X
SHL1_hf_tau_a	53.9	53.9	53.9	53.9	53.9	53.9	53.9	53.9	53.9	ms	53.9	53.9	X
SHL1_hf_tau_b	-28.2	-28.2	-28.2	-28.2	-28.2	-28.2	-28.2	-28.2	-28.2	mV	-28.2	-28.2	X
SHL1_hf_tau_c	4.9	4.9	4.9	4.9	4.9	4.9	4.9	4.9	4.9	mV	4.9	4.9	X
SHL1_hf_tau_d	27.3	27.3	27.3	27.3	27.3	27.3	27.3	27.3	27.3	ms	27.3	27.3	X
SHL1_hs_tau_a	842.2	842.2	842.2	842.2	842.2	842.2	842.2	842.2	842.2	ms	842.2	842.2	X
SHL1_hs_tau_b	-37.7	-37.7	-37.7	-37.7	-37.7	-37.7	-37.7	-37.7	-37.7	mV	-37.7	-37.7	X
SHL1_hs_tau_c	6.4	6.4	6.4	6.4	6.4	6.4	6.4	6.4	6.4	mV	6.4	6.4	X
SHL1_hs_tau_d	11.9	11.9	11.9	11.9	11.9	11.9	11.9	11.9	11.9	ms	11.9	11.9	X
SHK1_g	0.054781	0.022353	0.0259352	0.0824168	0.108504	0.0633638	0.0679101	0.0464193	0.0802559	nS	0	3	O
SHK1_m_inf_Veq	2	2	2	2	2	2	2	2	2	mV	2	2	X
SHK1_m_inf_ka	10	10	10	10	10	10	10	10	10	mV	10	10	X
SHK1_h_inf_Veq	-6.95	-6.95	-6.95	-6.95	-6.95	-6.95	-6.95	-6.95	-6.95	mV	-6.95	-6.95	X
SHK1_h_inf_ka	5.8	5.8	5.8	5.8	5.8	5.8	5.8	5.8	5.8	mV	5.8	5.8	X
SHK1_m_tau_a	26.6	26.6	26.6	26.6	26.6	26.6	26.6	26.6	26.6	ms	26.6	26.6	X
SHK1_m_tau_b	-33.7	-33.7	-33.7	-33.7	-33.7	-33.7	-33.7	-33.7	-33.7	mV	-33.7	-33.7	X
SHK1_m_tau_c	15.8	15.8	15.8	15.8	15.8	15.8	15.8	15.8	15.8	mV	15.8	15.8	X
SHK1_m_tau_d	-33.7	-33.7	-33.7	-33.7	-33.7	-33.7	-33.7	-33.7	-33.7	mV	-33.7	-33.7	X
SHK1_m_tau_e	15.4	15.4	15.4	15.4	15.4	15.4	15.4	15.4	15.4	mV	15.4	15.4	X
SHK1_m_tau_f	2	2	2	2	2	2	2	2	2	ms	2	2	X
SHK1_tau_h	1400	1400	1400	1400	1400	1400	1400	1400	1400	ms	1400	1400	X
EGL2_g	0.0618455	0.0686671	0.0312026	0.329067	0.0785917	0.363751	0.546196	0.187234	0.489727	nS	0	3	O
EGL2_m_inf_Veq	-6.9	-6.9	-6.9	-6.9	-6.9	-6.9	-6.9	-6.9	-6.9	mV	-6.9	-6.9	X
EGL2_m_inf_ka	14.9	14.9	14.9	14.9	14.9	14.9	14.9	14.9	14.9	mV	14.9	14.9	X
EGL2_m_tau_a	8.39	8.39	8.39	8.39	8.39	8.39	8.39	8.39	8.39	ms	8.39	8.39	X
EGL2_m_tau_b	-122.6	-122.6	-122.6	-122.6	-122.6	-122.6	-122.6	-122.6	-122.6	mV	-122.6	-122.6	X
EGL2_m_tau_c	13.8	13.8	13.8	13.8	13.8	13.8	13.8	13.8	13.8	mV	13.8	13.8	X
EGL2_m_tau_d	4.04	4.04	4.04	4.04	4.04	4.04	4.04	4.04	4.04	ms	4.04	4.04	X
IRK13_g	0.0145989	0.0938704	0.475524	0.11007	0.0186882	0.234048	1.20637	1.48658	1.21765	nS	0	3	O
IRK13_m_inf_Veq	-82	-82	-82	-82	-82	-82	-82	-82	-82	mV	-82	-82	X
IRK13_m_inf_ka	13	13	13	13	13	13	13	13	13	mV	13	13	X
IRK13_m_tau_a	17.1	17.1	17.1	17.1	17.1	17.1	17.1	17.1	17.1	ms	17.1	17.1	X
IRK13_m_tau_b	-17.8	-17.8	-17.8	-17.8	-17.8	-17.8	-17.8	-17.8	-17.8	mV	-17.8	-17.8	X
IRK13_m_tau_c	20.3	20.3	20.3	20.3	20.3	20.3	20.3	20.3	20.3	mV	20.3	20.3	X
IRK13_m_tau_d	43.4	43.4	43.4	43.4	43.4	43.4	43.4	43.4	43.4	mV	43.4	43.4	X
IRK13_m_tau_e	11.2	11.2	11.2	11.2	11.2	11.2	11.2	11.2	11.2	mV	11.2	11.2	X
IRK13_m_tau_f	3.8	3.8	3.8	3.8	3.8	3.8	3.8	3.8	3.8	ms	3.8	3.8	X
UNC103_g	0.0447752	0.0324429	0.040347	0.0782552	0.330587	0.0105368	0.522355	0.0811127	0.105689	nS	0	3	O
UNC103_m_inf_Veq	-15.1	-15.1	-15.1	-15.1	-15.1	-15.1	-15.1	-15.1	-15.1	mV	-15.1	-15.1	X
UNC103_m_inf_ka	7.85	7.85	7.85	7.85	7.85	7.85	7.85	7.85	7.85	mV	7.85	7.85	X
UNC103_h_inf_Veq	-48	-48	-48	-48	-48	-48	-48	-48	-48	mV	-48	-48	X
UNC103_h_inf_ki	28	28	28	28	28	28	28	28	28	mV	28	28	X
UNC103_m_tau_a	87.4	87.4	87.4	87.4	87.4	87.4	87.4	87.4	87.4	ms	87.4	87.4	X
UNC103_m_tau_b	-28.33	-28.33	-28.33	-28.33	-28.33	-28.33	-28.33	-28.33	-28.33	mV	-28.33	-28.33	X
UNC103_m_tau_c	13.1	13.1	13.1	13.1	13.1	13.1	13.1	13.1	13.1	mV	13.1	13.1	X
UNC103_m_tau_d	0.26	0.26	0.26	0.26	0.26	0.26	0.26	0.26	0.26	ms	0.26	0.26	X
UNC103_h_tau_a	8.16	8.16	8.16	8.16	8.16	8.16	8.16	8.16	8.16	ms	8.16	8.16	X
UNC103_h_tau_b	-25.28	-25.28	-25.28	-25.28	-25.28	-25.28	-25.28	-25.28	-25.28	mV	-25.28	-25.28	X
UNC103_h_tau_c	29.5	29.5	29.5	29.5	29.5	29.5	29.5	29.5	29.5	mV	29.5	29.5	X
UNC103_h_tau_d	0.23	0.23	0.23	0.23	0.23	0.23	0.23	0.23	0.23	ms	0.23	0.23	X
KQT1_g	0.0397232	0.0194758	0.0238571	0.0486964	0.148126	0.0262447	0.363883	0.0450022	0.10638	nS	0	3	O
KQT1_m_inf_Veq	-17.61	-17.61	-17.61	-17.61	-17.61	-17.61	-17.61	-17.61	-17.61	mV	-17.61	-17.61	X
KQT1_m_inf_ka	9.58	9.58	9.58	9.58	9.58	9.58	9.58	9.58	9.58	mV	9.58	9.58	X
KQT1_s_inf_Veq_a	-86.84	-86.84	-86.84	-86.84	-86.84	-86.84	-86.84	-86.84	-86.84	mV	-86.84	-86.84	X
KQT1_s_inf_ks_a	15.05	15.05	15.05	15.05	15.05	15.05	15.05	15.05	15.05	mV	15.05	15.05	X
KQT1_s_inf_a	0.41	0.41	0.41	0.41	0.41	0.41	0.41	0.41	0.41		0.41	0.41	X
KQT1_s_inf_Veq_b	70.13	70.13	70.13	70.13	70.13	70.13	70.13	70.13	70.13	mV	70.13	70.13	X
KQT1_s_inf_ks_b	13.37	13.37	13.37	13.37	13.37	13.37	13.37	13.37	13.37	mV	13.37	13.37	X
KQT1_s_inf_b	0.59	0.59	0.59	0.59	0.59	0.59	0.59	0.59	0.59		0.59	0.59	X
KQT1_m_tau_a	895.9	895.9	895.9	895.9	895.9	895.9	895.9	895.9	895.9	ms	895.9	895.9	X
KQT1_m_tau_b	-18.01	-18.01	-18.01	-18.01	-18.01	-18.01	-18.01	-18.01	-18.01	mV	-18.01	-18.01	X
KQT1_m_tau_c	31.04	31.04	31.04	31.04	31.04	31.04	31.04	31.04	31.04	mV	31.04	31.04	X
KQT1_m_tau_d	10	10	10	10	10	10	10	10	10	mS	10	10	X
KQT1_s_tau_a	185845	185845	185845	185845	185845	185845	185845	185845	185845	mS	185845	185845	X
KQT1_s_tau_b	39.44	39.44	39.44	39.44	39.44	39.44	39.44	39.44	39.44	mV	39.44	39.44	X
KQT1_s_tau_c	7.34	7.34	7.34	7.34	7.34	7.34	7.34	7.34	7.34	mV	7.34	7.34	X
KQT1_s_tau_d	1077	1077	1077	1077	1077	1077	1077	1077	1077	ms	1077	1077	X
EXP2_g	0.0103168	0.00568875	0.0257564	0.0036525	0.0312323	0.00377075	0.00153028	0.000247447	0.000355057	nS	0	3	O
EXP2_m_inf_Veq	-17	-17	-17	-17	-17	-17	-17	-17	-17	mV	-17	-17	X
EXP2_m_inf_ka	6.5	6.5	6.5	6.5	6.5	6.5	6.5	6.5	6.5	mV	6.5	6.5	X
EXP2_h_inf_Veq	-50	-50	-50	-50	-50	-50	-50	-50	-50	mV	-50	-50	X
EXP2_h_inf_ki	10	10	10	10	10	10	10	10	10	mV	10	10	X
EXP2_m_tau_a	40	40	40	40	40	40	40	40	40	ms	40	40	X
EXP2_m_tau_b	-20.52	-20.52	-20.52	-20.52	-20.52	-20.52	-20.52	-20.52	-20.52	mV	-20.52	-20.52	X
EXP2_m_tau_c	4.71	4.71	4.71	4.71	4.71	4.71	4.71	4.71	4.71	mV	4.71	4.71	X
EXP2_m_tau_d	2.4	2.4	2.4	2.4	2.4	2.4	2.4	2.4	2.4	ms	2.4	2.4	X
EXP2_h_tau_a	1.28	1.28	1.28	1.28	1.28	1.28	1.28	1.28	1.28	ms	1.28	1.28	X
EXP2_h_tau_b	-89.02	-89.02	-89.02	-89.02	-89.02	-89.02	-89.02	-89.02	-89.02	mV	-89.02	-89.02	X
EXP2_h_tau_c	49.35	49.35	49.35	49.35	49.35	49.35	49.35	49.35	49.35	mV	49.35	49.35	X
EXP2_h_tau_d	0.87	0.87	0.87	0.87	0.87	0.87	0.87	0.87	0.87	ms	0.87	0.87	X
SLO1_g	0.00318462	0.00153254	0.00085689	0.0544411	0.0207699	0.0517124	0.119723	0.00824543	0.125469	nS	0	3	O
SLO1_CaV_g	0.0124669	0.00209997	0.00177078	0.0414054	0.114662	0.0616813	0.466269	0.0196942	0.281278	nS	0	3	O
SLO1_wyx	0.013	0.013	0.013	0.013	0.013	0.013	0.013	0.013	0.013	mV-1	0.013	0.013	X
SLO1_wxy	-0.028	-0.028	-0.028	-0.028	-0.028	-0.028	-0.028	-0.028	-0.028	mV-1	-0.028	-0.028	X
SLO1_w0_neg	3.15	3.15	3.15	3.15	3.15	3.15	3.15	3.15	3.15	ms-1	3.15	3.15	X
SLO1_w0_pos	0.16	0.16	0.16	0.16	0.16	0.16	0.16	0.16	0.16	ms-1	0.16	0.16	X
SLO1_Kxy	55.73	55.73	55.73	55.73	55.73	55.73	55.73	55.73	55.73	uM	55.73	55.73	X
SLO1_nxy	1.3	1.3	1.3	1.3	1.3	1.3	1.3	1.3	1.3		1.3	1.3	X
SLO1_Kyx	34.34	34.34	34.34	34.34	34.34	34.34	34.34	34.34	34.34	uM	34.34	34.34	X
SLO1_nyx	0.001	0.001	0.001	0.001	0.001	0.001	0.001	0.001	0.001		0.001	0.001	X
SLO2_g	0.0103589	0.00134493	0.00446759	0.000879461	0.013272	0.00025429	0.00393047	0.000336353	0.000232566	nS	0	3	O
SLO2_CaV_g	0.178376	0.126118	0.225182	0.078338	0.0917258	0.0762546	0.154252	0.10876	0.160208	nS	0	3	O
SLO2_wyx	0.019	0.019	0.019	0.019	0.019	0.019	0.019	0.019	0.019	mV-1	0.019	0.019	X
SLO2_wxy	-0.024	-0.024	-0.024	-0.024	-0.024	-0.024	-0.024	-0.024	-0.024	mV-1	-0.024	-0.024	X
SLO2_w0_neg	0.9	0.9	0.9	0.9	0.9	0.9	0.9	0.9	0.9	ms-1	0.9	0.9	X
SLO2_w0_pos	0.027	0.027	0.027	0.027	0.027	0.027	0.027	0.027	0.027	ms-1	0.027	0.027	X
SLO2_Kxy	93.45	93.45	93.45	93.45	93.45	93.45	93.45	93.45	93.45	uM	93.45	93.45	X
SLO2_nxy	1.84	1.84	1.84	1.84	1.84	1.84	1.84	1.84	1.84		1.84	1.84	X
SLO2_Kyx	3294.55	3294.55	3294.55	3294.55	3294.55	3294.55	3294.55	3294.55	3294.55	uM	3294.55	3294.55	X
SLO2_nyx	0.0001	0.0001	0.0001	0.0001	0.0001	0.0001	0.0001	0.0001	0.0001		0.0001	0.0001	X
EGL19_g	0.192688	0.232894	0.316227	0.0159256	0.0125229	0.145372	0.00676659	0.120887	0.0207622	nS	0	3	O
EGL19_m_inf_Veq	-5.6	-5.6	-5.6	-5.6	-5.6	-5.6	-5.6	-5.6	-5.6	mV	-5.6	-5.6	X
EGL19_m_inf_ka	7.5	7.5	7.5	7.5	7.5	7.5	7.5	7.5	7.5	mV	7.5	7.5	X
EGL19_h_inf_Veq	14.9	14.9	14.9	14.9	14.9	14.9	14.9	14.9	14.9	mV	14.9	14.9	X
EGL19_h_inf_ki	12	12	12	12	12	12	12	12	12	mV	12	12	X
EGL19_h_inf_Veq_b	-20.5	-20.5	-20.5	-20.5	-20.5	-20.5	-20.5	-20.5	-20.5	mV	-20.5	-20.5	X
EGL19_h_inf_ki_b	8.1	8.1	8.1	8.1	8.1	8.1	8.1	8.1	8.1	mV	8.1	8.1	X
EGL19_h_inf_a	1.43	1.43	1.43	1.43	1.43	1.43	1.43	1.43	1.43		1.43	1.43	X
EGL19_h_inf_b	0.14	0.14	0.14	0.14	0.14	0.14	0.14	0.14	0.14		0.14	0.14	X
EGL19_h_inf_c	5.96	5.96	5.96	5.96	5.96	5.96	5.96	5.96	5.96		5.96	5.96	X
EGL19_h_inf_d	0.6	0.6	0.6	0.6	0.6	0.6	0.6	0.6	0.6		0.6	0.6	X
EGL19_m_tau_a	2.9	2.9	2.9	2.9	2.9	2.9	2.9	2.9	2.9	ms	2.9	2.9	X
EGL19_m_tau_b	-4.8	-4.8	-4.8	-4.8	-4.8	-4.8	-4.8	-4.8	-4.8	mV	-4.8	-4.8	X
EGL19_m_tau_c	6	6	6	6	6	6	6	6	6	mV	6	6	X
EGL19_m_tau_d	1.9	1.9	1.9	1.9	1.9	1.9	1.9	1.9	1.9	ms	1.9	1.9	X
EGL19_m_tau_e	-8.6	-8.6	-8.6	-8.6	-8.6	-8.6	-8.6	-8.6	-8.6	mV	-8.6	-8.6	X
EGL19_m_tau_f	30	30	30	30	30	30	30	30	30	mV	30	30	X
EGL19_m_tau_g	2.3	2.3	2.3	2.3	2.3	2.3	2.3	2.3	2.3	ms	2.3	2.3	X
EGL19_h_tau_a	0.4	0.4	0.4	0.4	0.4	0.4	0.4	0.4	0.4		0.4	0.4	X
EGL19_h_tau_b	44.6	44.6	44.6	44.6	44.6	44.6	44.6	44.6	44.6	ms	44.6	44.6	X
EGL19_h_tau_c	-33	-33	-33	-33	-33	-33	-33	-33	-33	mV	-33	-33	X
EGL19_h_tau_d	5	5	5	5	5	5	5	5	5	mV	5	5	X
EGL19_h_tau_e	36.4	36.4	36.4	36.4	36.4	36.4	36.4	36.4	36.4	ms	36.4	36.4	X
EGL19_h_tau_f	18.7	18.7	18.7	18.7	18.7	18.7	18.7	18.7	18.7	mV	18.7	18.7	X
EGL19_h_tau_g	3.7	3.7	3.7	3.7	3.7	3.7	3.7	3.7	3.7	mV	3.7	3.7	X
EGL19_h_tau_h	43.1	43.1	43.1	43.1	43.1	43.1	43.1	43.1	43.1	ms	43.1	43.1	X
UNC2_g	0.116129	0.0376831	0.0362097	0.0864512	0.154911	0.190561	0.0181441	0.0173483	0.0839925	nS	0	3	O
UNC2_m_inf_Veq	-37.2	-37.2	-37.2	-37.2	-37.2	-37.2	-37.2	-37.2	-37.2	mV	-37.2	-37.2	X
UNC2_m_inf_ka	4	4	4	4	4	4	4	4	4	mV	4	4	X
UNC2_h_inf_Veq	-77.5	-77.5	-77.5	-77.5	-77.5	-77.5	-77.5	-77.5	-77.5	mV	-77.5	-77.5	X
UNC2_h_inf_ki	5.6	5.6	5.6	5.6	5.6	5.6	5.6	5.6	5.6	mV	5.6	5.6	X
UNC2_m_tau_a	1.5	1.5	1.5	1.5	1.5	1.5	1.5	1.5	1.5	ms	1.5	1.5	X
UNC2_m_tau_b	-38.2	-38.2	-38.2	-38.2	-38.2	-38.2	-38.2	-38.2	-38.2	mV	-38.2	-38.2	X
UNC2_m_tau_c	9.1	9.1	9.1	9.1	9.1	9.1	9.1	9.1	9.1	mV	9.1	9.1	X
UNC2_m_tau_d	15.4	15.4	15.4	15.4	15.4	15.4	15.4	15.4	15.4	mV	15.4	15.4	X
UNC2_m_tau_e	0.1	0.1	0.1	0.1	0.1	0.1	0.1	0.1	0.1	ms	0.1	0.1	X
UNC2_h_tau_a	142.5	142.5	142.5	142.5	142.5	142.5	142.5	142.5	142.5	ms	142.5	142.5	X
UNC2_h_tau_b	22.9	22.9	22.9	22.9	22.9	22.9	22.9	22.9	22.9	mV	22.9	22.9	X
UNC2_h_tau_c	-3.5	-3.5	-3.5	-3.5	-3.5	-3.5	-3.5	-3.5	-3.5	mV	-3.5	-3.5	X
UNC2_h_tau_d	122.6	122.6	122.6	122.6	122.6	122.6	122.6	122.6	122.6	ms	122.6	122.6	X
UNC2_h_tau_e	-6.1	-6.1	-6.1	-6.1	-6.1	-6.1	-6.1	-6.1	-6.1	mV	-6.1	-6.1	X
UNC2_h_tau_f	-3.6	-3.6	-3.6	-3.6	-3.6	-3.6	-3.6	-3.6	-3.6	mV	-3.6	-3.6	X
CCA1_g	0.022546	0.0293606	0.0279069	0.0375824	0.0962988	0.011946	0.0177306	0.0763877	0.0736153	nS	0	3	O
CCA1_m_inf_Veq	-57.5	-57.5	-57.5	-57.5	-57.5	-57.5	-57.5	-57.5	-57.5	mV	-57.5	-57.5	X
CCA1_m_inf_ka	7.6	7.6	7.6	7.6	7.6	7.6	7.6	7.6	7.6	mV	7.6	7.6	X
CCA1_h_inf_Veq	-73	-73	-73	-73	-73	-73	-73	-73	-73	mV	-73	-73	X
CCA1_h_inf_ki	7	7	7	7	7	7	7	7	7	mV	7	7	X
CCA1_m_tau_a	20	20	20	20	20	20	20	20	20	ms	20	20	X
CCA1_m_tau_b	-92.5	-92.5	-92.5	-92.5	-92.5	-92.5	-92.5	-92.5	-92.5	mV	-92.5	-92.5	X
CCA1_m_tau_c	21.1	21.1	21.1	21.1	21.1	21.1	21.1	21.1	21.1	mV	21.1	21.1	X
CCA1_m_tau_d	0.4	0.4	0.4	0.4	0.4	0.4	0.4	0.4	0.4	ms	0.4	0.4	X
CCA1_h_tau_a	22.4	22.4	22.4	22.4	22.4	22.4	22.4	22.4	22.4	ms	22.4	22.4	X
CCA1_h_tau_b	-75.7	-75.7	-75.7	-75.7	-75.7	-75.7	-75.7	-75.7	-75.7	mV	-75.7	-75.7	X
CCA1_h_tau_c	9.4	9.4	9.4	9.4	9.4	9.4	9.4	9.4	9.4	mV	9.4	9.4	X
CCA1_h_tau_d	1.6	1.6	1.6	1.6	1.6	1.6	1.6	1.6	1.6	ms	1.6	1.6	X
NCA_g	0.031294	0.016759	0.0138317	0.0138433	0.0222673	0.0137874	0.0212535	0.0170011	0.0183274	nS	0	3	O
LEAK_g	0.126332	0.0802897	0.136676	0.0962014	0.121802	0.0609571	0.0678221	0.0457185	0.0449205	nS	0	3	O
Ca_F	96485	96485	96485	96485	96485	96485	96485	96485	96485		96485	96485	X
Ca_d	0.1	0.1	0.1	0.1	0.1	0.1	0.1	0.1	0.1		0.1	0.1	X
Ca_A	1	1	1	1	1	1	1	1	1		1	1	X
Ca_Beta	1	1	1	1	1	1	1	1	1	ms-1	1	1	X
VK	-30.234	-57.3433	-56.7496	-57.2984	-44.6758	-53.0377	-85.7439	-81.4672	-82.2192	mV	-99.9975	-0.0114977	O
VCa	38.8089	44.0723	48.6864	39.2015	41.67	30.0663	46.513	32.0339	36.1512	mV	20.0025	100	O
VNa	23.7805	33.3434	32.3483	56.0297	35.5704	47.6525	122.475	104.455	117.1	mV	20.0043	149.999	O
VLEAK	-56.8214	-65.4561	-59.1172	-68.5151	-56.8326	-70.255	-70.2991	-68.3622	-67.9178	mV	-80	29.955	O
V0	-38	-48.5931	-54.458	-53	-46.6239	-50.2128	-78	-75.0705	-73.3003	mV	-89.9985	-2.0004	O
m_SHL1_0	0.62307	0.715796	0.696113	0.539739	0.601723	0.553336	0.454634	0.633214	0.415055		0.00100403	0.998997	O
dh_SHL1_f_0	0.616901	0.661465	0.675667	0.372746	0.432003	0.469727	0.45494	0.602654	0.474192		0.00101056	0.998988	O
dh_SHL1_s_0	0.495847	0.481866	0.457198	0.478849	0.472819	0.414565	0.541747	0.458125	0.493978		0.00101523	0.998999	O
dm_SHK1_0	0.278534	0.305411	0.291689	0.503837	0.392355	0.498059	0.580087	0.485766	0.470628		0.00106562	0.998997	O
dh_SHK1_0	0.336922	0.453533	0.397805	0.561107	0.533978	0.573875	0.423045	0.462685	0.456796		0.00103973	0.998986	O
dm_EGL2_0	0.682416	0.734623	0.570886	0.653293	0.528775	0.652647	0.283506	0.497095	0.51443		0.00100059	0.998995	O
dm_IRK13_0	0.218006	0.136235	0.138247	0.456191	0.490113	0.383252	0.683028	0.328828	0.43475		0.00101976	0.998997	O
dm_UNC103_0	0.218898	0.285051	0.331175	0.492519	0.460742	0.47593	0.642418	0.606689	0.671217		0.00102641	0.998984	O
dh_UNC103_0	0.534584	0.486909	0.341167	0.562208	0.431832	0.550411	0.452577	0.447176	0.539578		0.00100464	0.998983	O
dm_KQT1_0	0.456767	0.436826	0.376086	0.502186	0.419809	0.529891	0.534649	0.459501	0.410914		0.00101773	0.998958	O
ds_KQT1_0	0.676985	0.647271	0.73324	0.370439	0.440237	0.420193	0.349307	0.484757	0.525897		0.0010006	0.998989	O
dm_EXP2_0	0.624914	0.636531	0.641449	0.502625	0.585857	0.458037	0.518404	0.575728	0.724626		0.00100101	0.99895	O
dh_EXP2_0	0.306682	0.324648	0.232696	0.530876	0.461031	0.571102	0.520695	0.519896	0.536329		0.00101163	0.998998	O
dm_SLO1_0	0.453777	0.524842	0.634431	0.522772	0.4046	0.604943	0.431655	0.600262	0.532321		0.0010234	0.998983	O
dm_SLO2_0	0.720306	0.817933	0.769072	0.570462	0.576251	0.625537	0.509284	0.647974	0.648566		0.00101317	0.998993	O
dm_SLO1_EGL19_0	0.651218	0.573253	0.415645	0.500898	0.658653	0.440489	0.345822	0.371365	0.331089		0.00100376	0.998895	O
dm_SLO1_UNC2_0	0.737566	0.732154	0.826326	0.41595	0.582301	0.46746	0.244342	0.465505	0.407574		0.00101085	0.998998	O
dm_SLO2_EGL19_0	0.527898	0.58264	0.58645	0.520837	0.551859	0.473417	0.475546	0.571972	0.528466		0.00102983	0.998993	O
dm_SLO2_UNC2_0	0.765048	0.778827	0.736596	0.507314	0.646922	0.443895	0.363951	0.555347	0.595964		0.00102948	0.998974	O
dm_EGL19_0	0.697743	0.779345	0.814949	0.45791	0.449633	0.402924	0.394976	0.621949	0.518812		0.00100269	0.99897	O
dh_EGL19_0	0.251837	0.398274	0.413865	0.492104	0.415103	0.568937	0.597472	0.655281	0.449636		0.00105712	0.998993	O
dm_UNC2_0	0.380411	0.371733	0.354514	0.462317	0.461381	0.511903	0.621131	0.57998	0.583422		0.00105128	0.998984	O
dh_UNC2_0	0.604013	0.679203	0.689954	0.427247	0.595644	0.421039	0.395629	0.473108	0.493921		0.00100298	0.998998	O
dm_CCA1_0	0.484555	0.379559	0.399621	0.470139	0.515197	0.292774	0.414331	0.239694	0.286798		0.00100486	0.998988	O
dh_CCA1_0	0.603613	0.70229	0.59687	0.541388	0.639092	0.516459	0.601001	0.680551	0.569053		0.00103009	0.998993	O
dCa2_0	0.0001	0.0001	0.0001	0.0001	0.0001	0.0001	0.0001	0.0001	0.0001	uM	0.0001	0.0001	X
C	9.99943	9.99953	9.99953	9.99955	9.99899	9.99955	9.99953	9.99955	9.99955	pF	0.0101227	9.99955	O

## Sheet: Large
Parameters	RIM	DVC	HSN	AIY	URX	RIS	AFD	AWB	AWC	Unit	Min	Max	Fitted
SHL1_g	0.0202214	0.0140981	0.0159655	0.0790007	0.194311	0.075151	0.276847	0.0705258	0.26702	nS	0	3	O
SHL1_m_inf_Veq	-6.68499	-6.52165	-6.88706	-6.79517	-6.74863	-6.91735	-6.90376	-6.68438	-6.71302	mV	-10.2	-3.40018	O
SHL1_m_inf_ka	14.3192	14.399	13.8556	14.2482	14.5086	14.4769	14.0855	14.1917	13.8762	mV	7.05032	21.1499	O
SHL1_h_inf_Veq	-38.9142	-40.5592	-39.4178	-40.1812	-41.2094	-38.8622	-40.4162	-40.4906	-39.8068	mV	-59.9988	-20.0001	O
SHL1_h_inf_ka	8.67848	8.70776	8.32154	8.50681	8.53159	8.28206	7.95178	8.57959	8.0577	mV	4.15016	12.4499	O
SHL1_m_tau_a	2.09995	2.09994	2.0999	2.09992	2.09885	2.09964	2.09979	2.09759	2.09986	ms	0.700003	2.09996	O
SHL1_m_tau_b	-26.2462	-26.2438	-26.2214	-26.247	-26.0917	-26.1666	-26.2494	-25.9861	-26.2492	mV	-26.2499	-8.75135	O
SHL1_m_tau_c	19.1875	19.0582	19.2714	18.4224	11.2972	17.3035	17.6431	16.7955	18.9407	mV	6.45002	19.35	O
SHL1_m_tau_d	-1.85177	-1.86652	-2.01933	-1.85734	-2.12405	-1.92537	-4.84894	-2.4219	-3.96947	mV	-5.54991	-1.85023	O
SHL1_m_tau_e	9.74999	9.74998	9.74997	9.73093	9.68105	9.73569	3.26288	9.73467	3.30047	mV	3.25012	9.74999	O
SHL1_m_tau_f	0.299998	0.299998	0.299998	0.299987	0.299237	0.299906	0.29987	0.299909	0.299881	ms	0.1	0.299998	O
SHL1_hf_tau_a	57.9305	58.6026	58.6322	57.0571	50.5905	55.2569	53.3088	54.2582	57.9472	ms	26.9509	80.8491	O
SHL1_hf_tau_b	-26.6303	-26.196	-28.5204	-25.6249	-30.3583	-28.042	-24.8236	-27.929	-20.5795	mV	-42.2997	-14.1014	O
SHL1_hf_tau_c	5.22574	5.10355	4.73868	4.8997	5.00024	4.83617	4.69487	4.8189	4.37208	mV	2.45004	7.3499	O
SHL1_hf_tau_d	26.1249	24.464	25.6916	30.4327	30.3018	28.1262	35.6193	26.3618	32.1137	ms	13.6506	40.9497	O
SHL1_hs_tau_a	857.771	762.832	892.307	879.308	876.883	883.676	864.359	856.16	841.275	ms	421.118	1263.29	O
SHL1_hs_tau_b	-35.9718	-37.149	-36.5001	-31.784	-34.4096	-32.8048	-26.2999	-36.8635	-26.0931	mV	-56.5499	-18.8503	O
SHL1_hs_tau_c	6.62459	6.60074	6.34294	7.41921	6.99436	6.9408	6.59655	6.55176	6.85507	mV	3.20003	9.59998	O
SHL1_hs_tau_d	11.4655	11.3579	11.1408	11.8222	12.3869	12.8716	11.1197	11.6585	11.6373	ms	5.95008	17.85	O
SHK1_g	0.0300055	0.020648	0.00954389	0.0936456	0.119623	0.0777571	0.241703	0.0429843	0.14772	nS	0	3	O
SHK1_m_inf_Veq	2.00937	1.96121	1.87749	2.02978	2.1095	2.10584	2.11048	2.07047	1.89678	mV	1.00004	2.99999	O
SHK1_m_inf_ka	10.166	10.1716	10.2694	9.64363	9.7318	9.69953	9.14764	9.51214	8.88414	mV	5.00041	14.9998	O
SHK1_h_inf_Veq	-6.80869	-6.92939	-7.18445	-7.40759	-6.85751	-7.00374	-4.77811	-7.32557	-4.91036	mV	-10.4249	-3.47518	O
SHK1_h_inf_ka	5.93252	5.75254	6.404	5.84793	5.6025	5.91394	8.39291	4.85807	8.01799	mV	2.90006	8.69994	O
SHK1_m_tau_a	33.7433	31.6143	30.7875	32.765	30.4548	32.801	31.0076	30.4919	31.6348	ms	13.3003	39.8999	O
SHK1_m_tau_b	-34.6497	-33.88	-35.813	-34.6986	-35.3258	-35.1882	-36.2987	-34.1612	-38.535	mV	-50.5497	-16.8503	O
SHK1_m_tau_c	15.4441	16.9449	16.5	16.7319	16.4041	18.034	16.1721	14.7541	14.9863	mV	7.9006	23.6998	O
SHK1_m_tau_d	-17.8542	-19.0489	-20.8978	-17.7184	-25.4674	-22.6988	-19.716	-22.8125	-19.2718	mV	-50.55	-16.8514	O
SHK1_m_tau_e	22.4129	20.9956	21.2258	19.266	18.0202	19.6962	13.1985	19.3451	15.2185	mV	7.70053	23.0998	O
SHK1_m_tau_f	2.27461	2.4209	2.30632	2.19345	1.87063	2.20982	1.76676	2.28522	1.85936	ms	1.00002	2.99998	O
SHK1_tau_h	1468.21	1524.6	1411.08	1463.14	1355.4	1377.47	1340.25	1406.87	1299.47	ms	700.018	2099.99	O
EGL2_g	0.0684682	0.043477	0.0146946	0.342303	0.476302	0.258862	0.61618	0.0997396	0.468291	nS	0	3	O
EGL2_m_inf_Veq	-7.16241	-7.17482	-7.04026	-6.25717	-6.61705	-6.78557	-7.78683	-6.97602	-7.2565	mV	-10.35	-3.45003	O
EGL2_m_inf_ka	15.6815	15.9074	15.1607	14.1744	13.0749	12.6311	9.62981	15.1608	10.6403	mV	7.45022	22.3499	O
EGL2_m_tau_a	7.54455	6.974	9.72649	10.0779	8.74791	8.21088	9.84784	7.68157	10.1529	ms	4.1953	12.585	O
EGL2_m_tau_b	-79.2997	-79.3367	-61.6429	-66.4818	-149.604	-130.466	-66.7089	-116.927	-63.1274	mV	-183.899	-61.3015	O
EGL2_m_tau_c	10.9951	9.90891	15.241	17.0888	14.6676	13.3085	17.4211	11.6773	18.4173	mV	6.90002	20.6999	O
EGL2_m_tau_d	6.05504	6.05432	6.01278	6.05158	4.76506	5.97219	6.0469	5.45079	6.04552	ms	2.02002	6.05984	O
IRK13_g	0.054299	0.010928	0.265707	0.0651768	0.00494494	0.0367761	0.939825	0.897371	0.832028	nS	0	3	O
IRK13_m_inf_Veq	-86.6809	-85.1897	-91.6512	-95.1923	-91.171	-101.914	-65.8996	-72.2714	-77.2757	mV	-122.999	-41.0029	O
IRK13_m_inf_ka	14.1305	16.2952	9.13935	13.3696	13.1703	11.6275	9.14836	9.83661	9.59986	mV	6.50011	19.4997	O
IRK13_m_tau_a	24.5073	24.5343	24.1504	23.3096	19.5403	19.8346	21.9258	20.0812	21.75	ms	8.55008	25.65	O
IRK13_m_tau_b	-24.612	-24.7639	-24.8018	-23.385	-19.6999	-20.1296	-21.9618	-20.4876	-19.8196	mV	-26.6995	-8.90057	O
IRK13_m_tau_c	29.9218	30.3167	30.2078	30.2696	25.9129	28.7012	29.4865	25.9178	30.2206	mV	10.1503	30.4499	O
IRK13_m_tau_d	41.6461	45.1204	39.7158	45.9698	43.4658	45.9722	49.2401	44.2634	46.2483	mV	21.7024	65.0997	O
IRK13_m_tau_e	11.5645	11.6269	12.6034	11.2465	11.2011	10.7117	11.3821	10.721	12.6039	mV	5.60023	16.7996	O
IRK13_m_tau_f	5.67772	5.6844	5.40539	5.68333	5.08291	5.5393	5.10935	5.14952	5.52481	ms	1.9	5.69998	O
UNC103_g	0.00465695	0.00400021	0.00433707	0.013479	0.0365279	0.0151986	0.14993	0.0376178	0.122322	nS	0	3	O
UNC103_m_inf_Veq	-16.2936	-16.2719	-16.5347	-15.0586	-14.7626	-14.2328	-14.5818	-13.7204	-14.9683	mV	-22.6498	-7.55017	O
UNC103_m_inf_ka	7.81446	7.40609	8.22865	7.94711	7.53351	7.94615	7.04133	7.62286	7.28619	mV	3.92507	11.775	O
UNC103_h_inf_Veq	-44.4476	-44.2187	-40.3372	-44.8845	-47.0163	-46.7055	-28.3626	-47.7032	-30.4871	mV	-71.9998	-24.0011	O
UNC103_h_inf_ki	31.254	33.4751	33.128	28.4421	29.9283	29.6052	39.503	26.6384	38.302	mV	14.0007	41.9998	O
UNC103_m_tau_a	88.5927	92.5881	76.2419	92.4247	80.71	86.8256	83.8495	98.1229	82.1335	ms	43.7004	131.099	O
UNC103_m_tau_b	-27.9952	-28.4737	-26.9258	-28.5704	-28.6654	-28.1349	-28.6825	-29.4728	-28.3154	mV	-42.4949	-14.1655	O
UNC103_m_tau_c	13.268	13.9685	12.1318	13.8077	12.4162	13.4001	12.3269	12.789	13.7987	mV	6.55007	19.6499	O
UNC103_m_tau_d	0.254796	0.226093	0.26741	0.257479	0.266157	0.253459	0.261132	0.237683	0.269794	ms	0.130002	0.39	O
UNC103_h_tau_a	8.45895	7.48928	8.25804	8.15447	8.14701	8.20604	7.32083	7.72781	8.53317	ms	4.08012	12.2399	O
UNC103_h_tau_b	-25.8467	-24.9987	-26.4746	-26.5586	-24.7341	-25.8032	-22.0393	-25.2286	-26.4588	mV	-37.9199	-12.6412	O
UNC103_h_tau_c	30.2688	30.4762	30.1079	29.0841	30.2422	28.7752	28.5171	28.3364	28.8583	mV	14.751	44.2493	O
UNC103_h_tau_d	0.238837	0.239323	0.231727	0.230079	0.237532	0.246017	0.214649	0.232655	0.227172	ms	0.115003	0.344996	O
KQT1_g	0.0246188	0.0169679	0.00694822	0.0966825	0.1318	0.077913	0.228104	0.0496082	0.154087	nS	0	3	O
KQT1_m_inf_Veq	-18.3594	-16.9083	-21.1522	-16.1965	-17.5119	-17.8213	-17.7251	-15.0463	-18.4891	mV	-26.4144	-8.80526	O
KQT1_m_inf_ka	9.66226	8.47218	9.4095	9.64466	9.79471	9.08137	6.61159	10.6957	6.78033	mV	4.79	14.3699	O
KQT1_s_inf_Veq_a	-82.9751	-85.9259	-94.9971	-85.8561	-88.3528	-87.788	-86.7021	-93.3686	-85.2362	mV	-130.26	-43.4245	O
KQT1_s_inf_ks_a	15.8534	16.7817	13.6084	14.9705	15.1938	16.1608	13.3269	14.9426	13.527	mV	7.52502	22.5747	O
KQT1_s_inf_a	0.41	0.41	0.41	0.41	0.41	0.41	0.41	0.41	0.41		0.41	0.41	X
KQT1_s_inf_Veq_b	93.5846	98.7996	67.4742	74.9567	84.2913	87.436	44.3019	87.8028	50.0516	mV	35.0661	105.195	O
KQT1_s_inf_ks_b	12.7024	11.3965	11.2867	12.5068	13.2245	12.5957	7.93831	12.7561	8.72142	mV	6.68542	20.0546	O
KQT1_s_inf_b	0.59	0.59	0.59	0.59	0.59	0.59	0.59	0.59	0.59		0.59	0.59	X
KQT1_m_tau_a	950.855	863.799	912.01	900.749	897.832	905.914	676.628	905.025	778.17	ms	447.956	1343.82	O
KQT1_m_tau_b	-19.5095	-18.1538	-17.7961	-18.1412	-17.1069	-17.6404	-19.2861	-17.9484	-20.33	mV	-27.015	-9.00507	O
KQT1_m_tau_c	32.8288	31.2873	34.0001	31.1854	31.1007	30.1169	33.4626	28.4527	32.6571	mV	15.5201	46.5586	O
KQT1_m_tau_d	10.3815	10.418	10.5444	9.92792	10.5075	10.2056	11.8288	10.0659	10.766	mS	5.00002	14.9998	O
KQT1_s_tau_a	193819	203796	194847	180024	182914	182389	212168	195521	208902	mS	92924.2	278767	O
KQT1_s_tau_b	37.1321	36.1948	39.3891	39.2804	41.5268	37.8463	32.8845	43.4228	37.1472	mV	19.7205	59.1594	O
KQT1_s_tau_c	7.26861	7.24443	7.76009	7.70313	7.33638	7.47762	7.84218	7.3311	7.29729	mV	3.67016	11.0099	O
KQT1_s_tau_d	1077.29	977.338	1066.75	1114.8	1079.9	1116.84	1287.34	1008.72	1242.74	ms	538.503	1615.45	O
EXP2_g	0.0304719	0.0100457	0.127049	0.00634415	0.00343702	0.00142085	0.00135076	0.00700308	0.00141488	nS	0	3	O
EXP2_m_inf_Veq	-16.5988	-15.4766	-16.4831	-17.3467	-16.4772	-18.1782	-15.9506	-16.1252	-16.6609	mV	-25.4996	-8.50014	O
EXP2_m_inf_ka	7.12198	6.80892	6.89858	6.45101	6.42674	6.84754	6.55293	7.07534	5.26166	mV	3.25	9.7499	O
EXP2_h_inf_Veq	-51.8169	-49.0274	-52.902	-51.4484	-50.7131	-51.0246	-47.8037	-49.4354	-51.6034	mV	-74.9999	-25	O
EXP2_h_inf_ki	9.81858	9.15341	11.3536	10.4663	10.1734	9.60495	9.52913	9.21323	8.80407	mV	5.00017	15	O
EXP2_m_tau_a	40.8715	41.3237	41.3208	40.7016	39.2134	39.0758	44.8419	39.7265	43.4852	ms	20.0036	59.9998	O
EXP2_m_tau_b	-19.6665	-17.1413	-21.6547	-20.1421	-20.3508	-20.0435	-18.246	-19.9214	-19.6451	mV	-30.7794	-10.2614	O
EXP2_m_tau_c	4.46019	4.17803	4.27643	4.52091	4.76497	4.92942	4.65632	4.58186	4.84977	mV	2.35503	7.06491	O
EXP2_m_tau_d	2.43861	2.39885	2.29793	2.31159	2.41822	2.44238	2.68048	2.37265	2.43428	ms	1.2	3.59999	O
EXP2_h_tau_a	1.22135	1.16637	1.33487	1.28124	1.17235	1.34788	1.05055	1.28345	1.37442	ms	0.640013	1.91999	O
EXP2_h_tau_b	-89.9083	-97.9521	-76.8109	-92.3081	-87.0727	-87.7085	-100.158	-91.351	-94.9701	mV	-133.53	-44.511	O
EXP2_h_tau_c	49.331	50.6221	47.2474	52.6605	49.2457	50.1198	53.7608	50.8025	54.9181	mV	24.6762	74.0247	O
EXP2_h_tau_d	0.928797	1.04129	0.852383	0.908073	0.824987	0.853933	0.976535	0.778646	1.00089	ms	0.435004	1.30497	O
SLO1_g	0.01137	0.0079293	0.000704373	0.439273	0.101069	0.068244	1.85102	0.0262817	1.63241	nS	0	3	O
SLO1_CaV_g	0.11614	0.0796806	0.07449	0.167922	0.178511	0.154828	0.166104	0.121279	0.109842	nS	0	3	O
SLO1_wyx	0.013	0.013	0.013	0.013	0.013	0.013	0.013	0.013	0.013	mV-1	0.013	0.013	X
SLO1_wxy	-0.028	-0.028	-0.028	-0.028	-0.028	-0.028	-0.028	-0.028	-0.028	mV-1	-0.028	-0.028	X
SLO1_w0_neg	3.15	3.15	3.15	3.15	3.15	3.15	3.15	3.15	3.15	ms-1	3.15	3.15	X
SLO1_w0_pos	0.16	0.16	0.16	0.16	0.16	0.16	0.16	0.16	0.16	ms-1	0.16	0.16	X
SLO1_Kxy	55.73	55.73	55.73	55.73	55.73	55.73	55.73	55.73	55.73	uM	55.73	55.73	X
SLO1_nxy	1.3	1.3	1.3	1.3	1.3	1.3	1.3	1.3	1.3		1.3	1.3	X
SLO1_Kyx	34.34	34.34	34.34	34.34	34.34	34.34	34.34	34.34	34.34	uM	34.34	34.34	X
SLO1_nyx	0.001	0.001	0.001	0.001	0.001	0.001	0.001	0.001	0.001		0.001	0.001	X
SLO2_g	0.00236508	0.00212551	0.0020273	0.0011499	0.00517572	0.00161673	0.00169473	0.00367779	0.00121871	nS	0	3	O
SLO2_CaV_g	0.248771	0.183009	0.216406	0.137808	0.180111	0.138403	0.146841	0.144035	0.151751	nS	0	3	O
SLO2_wyx	0.019	0.019	0.019	0.019	0.019	0.019	0.019	0.019	0.019	mV-1	0.019	0.019	X
SLO2_wxy	-0.024	-0.024	-0.024	-0.024	-0.024	-0.024	-0.024	-0.024	-0.024	mV-1	-0.024	-0.024	X
SLO2_w0_neg	0.9	0.9	0.9	0.9	0.9	0.9	0.9	0.9	0.9	ms-1	0.9	0.9	X
SLO2_w0_pos	0.027	0.027	0.027	0.027	0.027	0.027	0.027	0.027	0.027	ms-1	0.027	0.027	X
SLO2_Kxy	93.45	93.45	93.45	93.45	93.45	93.45	93.45	93.45	93.45	uM	93.45	93.45	X
SLO2_nxy	1.84	1.84	1.84	1.84	1.84	1.84	1.84	1.84	1.84		1.84	1.84	X
SLO2_Kyx	3294.55	3294.55	3294.55	3294.55	3294.55	3294.55	3294.55	3294.55	3294.55	uM	3294.55	3294.55	X
SLO2_nyx	0.0001	0.0001	0.0001	0.0001	0.0001	0.0001	0.0001	0.0001	0.0001		0.0001	0.0001	X
EGL19_g	0.21589	0.261321	0.291981	0.0525138	0.0144189	0.0203252	0.0155972	0.133587	0.0137387	nS	0	3	O
EGL19_m_inf_Veq	-5.76324	-5.35404	-5.76959	-5.83911	-5.88283	-6.03317	-4.97881	-5.82985	-5.63059	mV	-8.39993	-2.80006	O
EGL19_m_inf_ka	7.95783	8.30931	7.64389	7.74369	7.86021	7.91641	8.59337	7.76832	7.56076	mV	3.75039	11.2499	O
EGL19_h_inf_Veq	14.847	16.3546	13.3443	15.4306	14.5224	14.7174	18.1608	13.6202	16.2419	mV	7.4501	22.3496	O
EGL19_h_inf_ki	12.0786	11.1703	11.4794	11.443	12.4694	11.4123	11.1639	12.3601	11.4473	mV	6.00007	17.9995	O
EGL19_h_inf_Veq_b	-20.9197	-21.6277	-22.4626	-18.8572	-20.2498	-19.5839	-18.2503	-18.4855	-17.8391	mV	-30.75	-10.2502	O
EGL19_h_inf_ki_b	8.26123	7.72529	8.44902	8.39841	8.34918	8.23539	6.89677	9.03188	8.43887	mV	4.05002	12.15	O
EGL19_h_inf_a	1.43	1.43	1.43	1.43	1.43	1.43	1.43	1.43	1.43		1.43	1.43	X
EGL19_h_inf_b	0.14	0.14	0.14	0.14	0.14	0.14	0.14	0.14	0.14		0.14	0.14	X
EGL19_h_inf_c	5.96	5.96	5.96	5.96	5.96	5.96	5.96	5.96	5.96		5.96	5.96	X
EGL19_h_inf_d	0.6	0.6	0.6	0.6	0.6	0.6	0.6	0.6	0.6		0.6	0.6	X
EGL19_m_tau_a	2.74364	2.69729	2.9983	3.28576	2.97455	2.95983	2.98282	3.3003	3.42036	ms	1.45	4.34999	O
EGL19_m_tau_b	-5.34511	-5.14056	-4.7013	-4.59294	-4.28997	-4.27827	-4.16106	-5.04707	-5.60458	mV	-7.19997	-2.40009	O
EGL19_m_tau_c	5.89695	5.63879	6.16194	6.9575	5.61169	6.36691	6.46447	6.91595	7.53062	mV	3.00041	8.99999	O
EGL19_m_tau_d	2.08035	1.96444	1.77875	2.40311	2.01677	2.11012	2.6959	2.06633	2.64372	ms	0.950019	2.84997	O
EGL19_m_tau_e	-9.01525	-8.99075	-9.13194	-8.5514	-8.15819	-8.68403	-8.84627	-7.76407	-10.3258	mV	-12.9	-4.30001	O
EGL19_m_tau_f	32.9183	32.8081	30.8475	34.0042	33.3042	32.3511	35.4387	30.8482	32.49	mV	15.0001	44.9998	O
EGL19_m_tau_g	2.73975	2.45542	2.48559	3.20288	2.66367	2.96117	3.02486	2.64096	3.1386	ms	1.15004	3.44999	O
EGL19_h_tau_a	0.4	0.4	0.4	0.4	0.4	0.4	0.4	0.4	0.4		0.4	0.4	X
EGL19_h_tau_b	44.1728	46.1879	45.4975	45.2532	43.2189	45.7864	48.5341	43.4289	47.0492	ms	22.3003	66.8999	O
EGL19_h_tau_c	-30.4295	-29.2863	-32.6653	-35.015	-35.3627	-31.312	-19.4604	-31.3188	-18.567	mV	-49.4999	-16.5005	O
EGL19_h_tau_d	5.22025	5.848	4.63104	5.33471	4.72689	4.95895	4.79815	4.81677	5.63731	mV	2.50002	7.49998	O
EGL19_h_tau_e	36.1908	33.078	35.901	43.5124	38.8098	39.6728	44.0198	41.3899	45.341	ms	18.2	54.5994	O
EGL19_h_tau_f	19.4842	17.9637	16.8078	19.7145	21.0496	19.996	22.0269	20.6241	20.6005	mV	9.35002	28.0494	O
EGL19_h_tau_g	3.92262	4.07649	3.93381	3.78052	3.66544	3.69481	4.25323	4.0888	3.93066	mV	1.85	5.54999	O
EGL19_h_tau_h	53.2036	47.9373	49.5637	55.9318	43.729	51.5866	50.316	46.331	55.2041	ms	21.5505	64.6494	O
UNC2_g	0.00246189	0.000914148	0.00339538	0.00365813	0.00264871	0.00626533	0.201705	0.0183386	0.0732822	nS	0	3	O
UNC2_m_inf_Veq	-36.0185	-38.8508	-36.1523	-36.5908	-38.6045	-36.8627	-36.278	-35.2103	-37.7603	mV	-55.7988	-18.6005	O
UNC2_m_inf_ka	3.97968	3.98224	4.06892	3.99814	3.93884	4.12005	3.87941	3.90867	3.94206	mV	2.00002	5.99999	O
UNC2_h_inf_Veq	-80.2205	-85.0226	-76.4846	-79.6695	-78.979	-76.7631	-80.7285	-79.8189	-74.7295	mV	-116.248	-38.7522	O
UNC2_h_inf_ki	5.47882	5.62608	5.86672	6.11316	5.71489	5.34737	5.7166	5.39765	5.91057	mV	2.80012	8.39995	O
UNC2_m_tau_a	2.24998	2.24998	2.24998	2.24997	2.24985	2.24994	2.24995	2.24989	2.24996	ms	0.750006	2.24998	O
UNC2_m_tau_b	-43.5002	-45.3228	-46.8571	-38.7018	-42.1294	-40.8509	-34.156	-39.1706	-35.9981	mV	-57.2999	-19.101	O
UNC2_m_tau_c	11.5684	10.6209	11.7114	12.8398	11.1086	11.4957	6.62163	10.0034	10.3121	mV	4.55004	13.65	O
UNC2_m_tau_d	23.0978	23.0961	23.0832	23.0983	23.0157	23.0642	23.0991	22.8345	23.0991	mV	7.70006	23.1	O
UNC2_m_tau_e	0.143248	0.145513	0.114465	0.149702	0.110751	0.144463	0.149929	0.119422	0.149946	ms	0.050004	0.149997	O
UNC2_h_tau_a	150.691	145.136	162.956	158.811	155.323	152.003	171.41	158.886	168.063	ms	71.2513	213.746	O
UNC2_h_tau_b	23.2556	26.7488	19.5649	21.9204	22.8481	22.6898	26.0926	23.861	25.3458	mV	11.4501	34.3498	O
UNC2_h_tau_c	-3.50591	-3.48193	-3.77262	-3.44113	-3.77628	-3.46288	-3.49876	-3.73455	-3.43923	mV	-5.24996	-1.75009	O
UNC2_h_tau_d	123.635	122.687	118.607	122.623	118.905	127.354	106.106	109.625	110.584	ms	61.3032	183.899	O
UNC2_h_tau_e	-6.33996	-6.2835	-6.03895	-5.80885	-5.8777	-5.8094	-5.17656	-6.12241	-5.42548	mV	-9.14999	-3.05008	O
UNC2_h_tau_f	-3.64502	-3.57992	-3.78921	-3.67915	-3.20113	-3.67054	-2.67662	-3.3521	-3.0094	mV	-5.39992	-1.80004	O
CCA1_g	7.71293e-06	2.25744e-06	4.07594e-06	1.86239e-05	0.000724828	8.65354e-05	7.73175e-05	0.000104093	3.52412e-05	nS	0	3	O
CCA1_m_inf_Veq	-55.9097	-58.2817	-56.8775	-57.1165	-56.5641	-54.8618	-54.894	-54.2522	-54.8229	mV	-86.2492	-28.7503	O
CCA1_m_inf_ka	7.49903	7.52204	7.68547	7.62363	8.21472	7.79568	7.82453	7.44952	7.71177	mV	3.80008	11.3998	O
CCA1_h_inf_Veq	-79.2945	-77.4551	-81.1838	-77.0772	-76.8862	-75.6441	-79.669	-75.7473	-78.4579	mV	-109.499	-36.5007	O
CCA1_h_inf_ki	6.70796	7.05758	6.99834	7.3197	6.92376	7.15418	6.81793	7.27057	6.77221	mV	3.50014	10.4995	O
CCA1_m_tau_a	24.9334	22.0495	26.3904	25.4799	21.7492	22.625	29.0108	24.8286	28.861	ms	10.0001	29.9999	O
CCA1_m_tau_b	-107.009	-107.205	-113.849	-110.427	-100.584	-106.721	-111.536	-109.846	-115.471	mV	-138.75	-46.2542	O
CCA1_m_tau_c	20.6494	22.8192	18.411	21.2711	19.7876	19.9914	17.9936	20.5628	19.8303	mV	10.55	31.6496	O
CCA1_m_tau_d	0.411887	0.342459	0.394984	0.36362	0.40361	0.423692	0.491729	0.412584	0.38491	ms	0.200003	0.599995	O
CCA1_h_tau_a	30.7618	29.0767	31.9346	31.6771	23.7073	28.0772	33.2966	29.3874	33.3768	ms	11.2001	33.5999	O
CCA1_h_tau_b	-44.8438	-43.698	-40.4175	-38.6118	-55.7086	-40.7029	-38.0659	-48.7237	-38.0401	mV	-113.55	-37.852	O
CCA1_h_tau_c	8.93123	9.08841	8.51553	9.49303	9.33853	9.58547	10.5502	8.34109	10.3715	mV	4.70003	14.0999	O
CCA1_h_tau_d	1.66091	1.50128	1.80617	1.71738	1.66349	1.6133	1.5058	1.61292	1.56323	ms	0.800036	2.39996	O
NCA_g	0.00198219	0.00144818	0.000740749	0.00255601	0.00640469	0.00251106	0.00402625	0.002246	0.00254126	nS	0	3	O
LEAK_g	0.14434	0.113986	0.17494	0.144376	0.149523	0.133126	0.0624355	0.0919493	0.077065	nS	0	3	O
Ca_F	96485	96485	96485	96485	96485	96485	96485	96485	96485		96485	96485	X
Ca_d	0.1	0.1	0.1	0.1	0.1	0.1	0.1	0.1	0.1		0.1	0.1	X
Ca_A	1	1	1	1	1	1	1	1	1		1	1	X
Ca_Beta	1	1	1	1	1	1	1	1	1	ms-1	1	1	X
VK	-36.4518	-34.8202	-53.157	-39.1327	-20.7626	-33.3854	-78.0026	-75.3466	-76.6276	mV	-99.9997	-0.0114977	O
VCa	27.3813	33.8987	42.3311	25.9116	49.8464	36.4176	32.4615	36.5824	32.9367	mV	20.001	99.9982	O
VNa	85.6885	79.2432	76.1471	90.1435	74.9773	83.1824	75.4765	89.5118	84.7146	mV	20	149.999	O
VLEAK	-46.6773	-51.1325	-48.7498	-56.4898	-47.1541	-54.056	-41.8348	-57.1078	-49.5743	mV	-79.9993	29.9938	O
V0	-38	-48.5931	-54.458	-53	-46.6239	-50.2128	-78	-75.0705	-73.3003	mV	-89.9999	-2.00293	O
m_SHL1_0	0.499816	0.498457	0.336078	0.499751	0.485815	0.566265	0.393612	0.434229	0.523808		0.00100232	0.998989	O
dh_SHL1_f_0	0.496736	0.435355	0.529526	0.489889	0.45208	0.480051	0.442894	0.511	0.362408		0.0010501	0.998974	O
dh_SHL1_s_0	0.411794	0.316261	0.538039	0.448812	0.561363	0.461389	0.579462	0.554394	0.532129		0.00101493	0.998976	O
dm_SHK1_0	0.490004	0.543131	0.507352	0.493296	0.437242	0.527023	0.529607	0.461	0.420355		0.00102265	0.998978	O
dh_SHK1_0	0.489159	0.581008	0.554796	0.53235	0.505634	0.497643	0.615661	0.490395	0.56497		0.00101352	0.998995	O
dm_EGL2_0	0.51	0.429269	0.503594	0.396607	0.537098	0.478052	0.677058	0.50839	0.583941		0.00100059	0.998998	O
dm_IRK13_0	0.512919	0.497677	0.469456	0.491242	0.47603	0.473755	0.287127	0.437767	0.349896		0.00100948	0.998982	O
dm_UNC103_0	0.48059	0.446549	0.544588	0.430865	0.477757	0.502438	0.450088	0.526889	0.350295		0.00100021	0.998986	O
dh_UNC103_0	0.531102	0.441827	0.504984	0.462576	0.508044	0.509841	0.623365	0.46559	0.631038		0.0010039	0.998985	O
dm_KQT1_0	0.510618	0.44852	0.486102	0.443845	0.50812	0.528405	0.664392	0.440802	0.5607		0.00101063	0.998985	O
ds_KQT1_0	0.570887	0.520931	0.424631	0.490768	0.462948	0.446219	0.553141	0.541352	0.564492		0.00104604	0.998989	O
dm_EXP2_0	0.532189	0.419435	0.444321	0.508335	0.511811	0.516663	0.51924	0.44492	0.541798		0.00100101	0.998967	O
dh_EXP2_0	0.547178	0.636845	0.605737	0.536138	0.476863	0.4738	0.494751	0.487346	0.57315		0.0010019	0.998991	O
dm_SLO1_0	0.43249	0.428102	0.456247	0.495172	0.474568	0.522022	0.433911	0.511409	0.3877		0.00100839	0.99899	O
dm_SLO2_0	0.373865	0.308127	0.409988	0.411106	0.402819	0.408205	0.421851	0.41107	0.42745		0.00101317	0.998978	O
dm_SLO1_EGL19_0	0.509346	0.442606	0.600456	0.455781	0.523069	0.527525	0.598566	0.47554	0.484787		0.00103923	0.998992	O
dm_SLO1_UNC2_0	0.495529	0.44905	0.434014	0.479286	0.473314	0.540497	0.563708	0.568123	0.511369		0.00101085	0.998989	O
dm_SLO2_EGL19_0	0.575557	0.490426	0.537368	0.448496	0.454167	0.521288	0.374713	0.399192	0.450921		0.00101664	0.998993	O
dm_SLO2_UNC2_0	0.520479	0.508681	0.527799	0.48208	0.501691	0.510071	0.424675	0.398176	0.383125		0.00102752	0.998987	O
dm_EGL19_0	0.50137	0.442397	0.456202	0.483816	0.523122	0.443675	0.407749	0.54723	0.57247		0.00100723	0.998982	O
dh_EGL19_0	0.55767	0.591643	0.500847	0.568949	0.469136	0.535307	0.520995	0.507243	0.602495		0.00102012	0.998993	O
dm_UNC2_0	0.57151	0.498035	0.522289	0.461815	0.518684	0.374758	0.45546	0.494435	0.481922		0.00100558	0.998984	O
dh_UNC2_0	0.480652	0.508573	0.490239	0.506441	0.522725	0.547738	0.454195	0.379283	0.54072		0.00100212	0.998974	O
dm_CCA1_0	0.506407	0.374428	0.551513	0.498297	0.489087	0.501495	0.747415	0.578734	0.569728		0.0010184	0.998997	O
dh_CCA1_0	0.452067	0.387521	0.533031	0.447182	0.543333	0.488297	0.365657	0.476066	0.3776		0.00103009	0.998987	O
dCa2_0	0.0001	0.0001	0.0001	0.0001	0.0001	0.0001	0.0001	0.0001	0.0001	uM	0.0001	0.0001	X
C	9.9995	9.9995	9.9995	9.9995	9.9995	9.9995	9.9995	9.9995	9.9995	pF	0.0103772	9.9995	O
